# Supplementary material for: Simultaneous introduction of various palladium active sites into MOF via one-pot synthesis: Pd@[Cu3−xPdx(BTC)2]n
Source: Royal Society of Chemistry journal article supplement (doi:10.1039/c6dt02893d), 2016-01-01
Supplement: c6dt02893d1.pdf [file c6dt02893d1.pdf]

## Electronic Supplementary Information

**Simultaneous introduction of various palladium active sites into MOF  
via one-pot synthesis: Pd@[Cu<sub>3-x</sub>Pd<sub>x</sub>(BTC)<sub>2</sub>]<sub>n</sub>**

Wenhua Zhang,<sup>[a]</sup> Zhihao Chen,<sup>[c]</sup> Majd Al-Naji,<sup>[c]</sup> Penghu Guo,<sup>[d]</sup> Stefan Cwik,<sup>[a]</sup> Olesia Halbherr,<sup>[a]</sup>  
Yuemin Wang,<sup>[e]</sup> Martin Muhler,<sup>[d]</sup> Nicole Wilde,<sup>[c]</sup> Roger Gläser<sup>[c]</sup> and Roland A. Fischer\*<sup>[b]</sup>

## Experimental Section

### General procedure

All chemicals ( $\text{Cu}(\text{NO}_3)_2 \cdot 3\text{H}_2\text{O}$ , Pd acetate,  $\text{PdCl}_2$ , benzene-1,3,5-tricarboxylic acid ( $\text{H}_3\text{BTC}$ ), *p*-nitrophenol (PNP) (99%), sodium borohydride ( $\text{NaBH}_4$ ) (98%)) and all solvents ( $\text{H}_2\text{O}$ , ethanol and acetone) were used as commercially received unless otherwise noted.

The Powder X-Ray diffraction (PXRD) data were performed on an X' Pert PRO PANalytical diffractometer (Bragg–Brentano geometry with automatical divergence slits, position sensitive detector, continuous mode, room temperature, Cu-K $\alpha$  radiation, Ni-filter, in the range of  $2\theta = 5\text{--}50^\circ$ , step size  $0.01^\circ$ , time per step 250 s). FTIR spectra were recorded on a Bruker Alpha FTIR instrument in the ATR geometry with a diamond ATR unit in the range  $400\text{--}4000\text{ cm}^{-1}$  inside a LABStar MB 10 compact MBraun glove-box (argon atmosphere). Liquid phase  $^1\text{H-NMR}$  spectra were measured on a Bruker Avance DPX-200 spectrometer at 293 K in  $\text{DCl}/\text{DMSO-d}_6$  for the digested activated MOF samples using TMS as internal standards and normalizing the signals to the  $\text{DMSO-d}_6$  signal.  $\text{N}_2$  sorption measurements were performed using a Quantachrome Autosorp-1 MP instrument, optimized protocols and  $\text{N}_2$  of 99.9995% purity or a Micromeritics 3Flex instrument. Thermogravimetric analyses (TGA) were collected using a TG/DSC NETZSCH STA 409 PC instrument at a heating rate of  $5\text{ K min}^{-1}$  in a temperature range from  $30\text{--}600\text{ }^\circ\text{C}$  (sample weight 5–10 mg) under  $\text{N}_2$  (99.999%;) gas flow ( $20\text{ ml min}^{-1}$ ). Atomic absorption spectroscopic (AAS) analysis to determine *Cu* and *Pd* contents were performed in the Microanalytical Laboratory of the Department of Analytical Chemistry at the Ruhr-University Bochum. An AAS apparatus by Vario of type 6 (1998) was employed. Scanning electron microscopy (SEM) and Energy-dispersive X-ray spectroscopy (EDX) images were recorded from an FEI ESEM Dual Beam™ Quanta 3D FEG microscope. X-ray photoelectron spectroscopy (XPS) measurements were performed in a UHV setup equipped with a high-resolution Gammatdata-Scientia SES 2002 analyzer. A monochromatic Al K $\alpha$  X-ray source (energy 1486.6 eV) was used as incident radiation. The analyzer slit width was set at 0.3 mm and the pass energy was fixed at 200 eV for all the measurements. The overall energy resolution was better than 0.5 eV. A flood gun was used to compensate for the charging effects. All spectra reported here are calibrated to the C 1s corelevel binding energy at 285 eV. The XP spectra were deconvoluted using the CASA XPS program with a mixed Gaussian–Lorentzian function and Shirley background subtraction.

### Synthesis of $[\text{Cu}_3(\text{BTC})_2]_n$ (Cu-BTC)

$[\text{Cu}_3(\text{BTC})_2]_n$  was prepared following a reported method<sup>1</sup> at a little lower temperature ( $100\text{ }^\circ\text{C}$ ). Specifically,  $\text{Cu}(\text{NO}_3)_2 \cdot 3\text{H}_2\text{O}$  (1.8 mmol, 438 mg) and  $\text{H}_3\text{BTC}$  (1.0 mmol, 210 mg) were put into a Teflon vessel, and 12 ml of  $\text{H}_2\text{O}:\text{EtOH}$  (1:1) solution was subsequently added. The vessel was sealed in an autoclave and kept in a preheated oven at  $100\text{ }^\circ\text{C}$  for 12 h. The observed crude product was filtered and washed several times with distilled water and absolute ethanol. After

drying under ambient conditions the obtained powder (152 mg) was further activated by heating at 120 °C for 24 h under dynamic vacuum (ca.  $10^{-3}$  mbar).

#### **Synthesis of Cu/Pd-BTC\_1-3**

For synthesis of **Cu/Pd-BTC\_1-3**, 2.0 mmol of H<sub>3</sub>BTC (420 mg) was combined with 1.8 molar equivalents of a mixture of Cu(NO<sub>3</sub>)<sub>2</sub>·3H<sub>2</sub>O and Pd(II) acetate and then placed into a Teflon vessel. Subsequently 15ml of H<sub>2</sub>O/ EtOH (1:1) solution was added. The molar percentage and amount of each metal salts in the total metal source as well as their weight used in the starting reaction mixture are: for **Cu/Pd-BTC\_1** - Cu(NO<sub>3</sub>)<sub>2</sub>·3H<sub>2</sub>O (90%, 3.24 mmol, 783 mg) / Pd(OOCCH<sub>3</sub>)<sub>2</sub> (10%, 0.36 mmol, 80.8 mg); for **Cu/Pd-BTC\_2** - Cu(NO<sub>3</sub>)<sub>2</sub>·3H<sub>2</sub>O (85%, 3.06 mmol, 739 mg) / Pd(OOCCH<sub>3</sub>)<sub>2</sub> (15%, 0.54 mmol, 121.2 mg); for **Cu/Pd-BTC\_3** - Cu(NO<sub>3</sub>)<sub>2</sub>·3H<sub>2</sub>O (80%, 2.88 mmol, 696 mg) / Pd(OOCCH<sub>3</sub>)<sub>2</sub> (20%, 0.72 mmol, 161.6 mg). Afterwards the Teflon vessels were sealed in autoclaves and kept at 125 °C for 12h. The resulting powder product was collected by filtration and washed several times with distilled water and acetone. After drying under ambient conditions the obtained powder was activated by heating at 120 °C for 24 h under dynamic vacuum (ca.  $10^{-3}$  mbar).

#### **Synthesis of Cu/Pd-BTC\_4**

For sample **Cu/Pd-BTC\_4**, 0.48 mmol of H<sub>3</sub>btc (101 mg) was combined with 1.5 molar equivalents of mixture of Cu(NO<sub>3</sub>)<sub>2</sub>·3H<sub>2</sub>O (80%, 0.58 mmol, 139 mg) / PdCl<sub>2</sub> (20%, 0.14 mmol, 25.5 mg) and then placed into a Teflon vessel. Subsequently 6ml of H<sub>2</sub>O/ethanol (1:1) solution was added. The Teflon vessel was sealed in an autoclave and kept in the oven at 90 °C for 16h. The resulting power product was collected by filtration and washed several times with distilled water and acetone, respectively. After dried under ambient conditions the obtained powder was further activated by heating at 120 °C for 24 h under dynamic vacuum (ca.  $10^{-3}$  mbar).

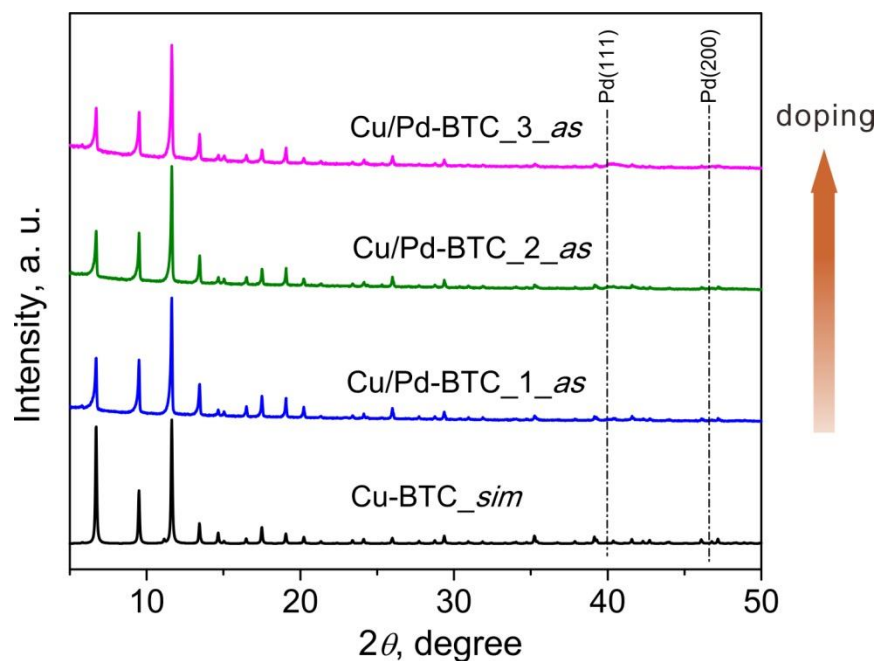

**Figure S1.** PXRD patterns of the as-synthesized Pd@[Cu<sub>3-x</sub>Pd<sub>x</sub>(BTC)<sub>2</sub>]<sub>n</sub> (**Cu/Pd-BTC\_1-3**) in comparison with simulated patterns of non-doped [Cu<sub>3</sub>(BTC)<sub>2</sub>]<sub>n</sub>. The vertical dash lines correspond to the peak position of (111) and (200) planes of the face-centered cubic (fcc) Pd-structure.

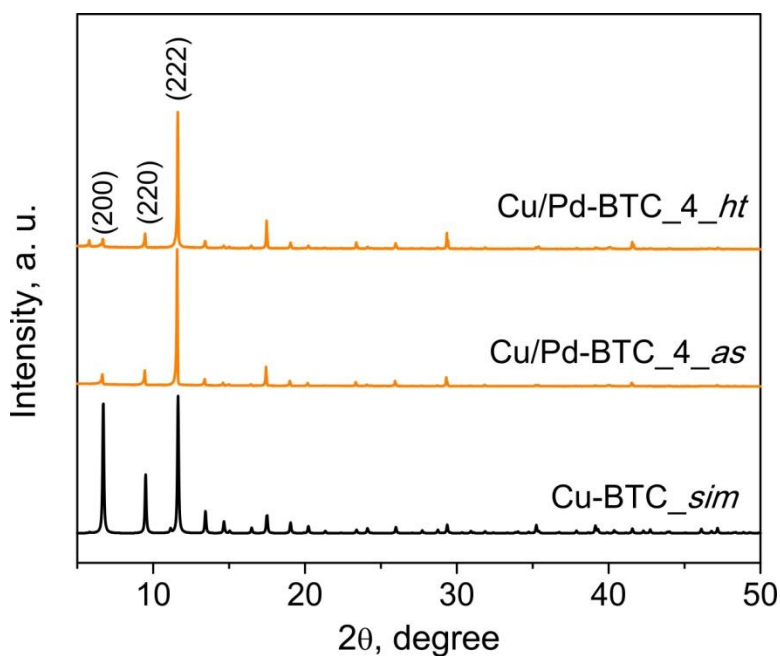

**Figure S2.** PXRD patterns of the as-synthesized and activated **Cu/Pd-BTC\_4** in comparison with simulated patterns of non-doped [Cu<sub>3</sub>(BTC)<sub>2</sub>]<sub>n</sub> (**Cu-BTC\_sim**). The well matched patterns with parent Cu-BTC suggest that the crystallinity of **Cu/Pd-BTC\_4** is preserved after the doping of Pd-species.

**Table S1.** Calculated cell parameters of the **Cu/Pd-BTC\_1-3** (TOPAS academic software and Pawley method<sup>2</sup> has been employed) in comparison with that obtained from the single crystal data of the reported  $[\text{Cu}_3(\text{BTC})_2]_n$ .

| Sample                            | a (Å)  | V (Å <sup>3</sup> ) | Space group | R <sub>wp</sub> | R <sub>exp</sub> |
|-----------------------------------|--------|---------------------|-------------|-----------------|------------------|
| $[\text{Cu}_3(\text{BTC})_2]_n^1$ | 26.343 | 18280               | Fm-3m       | -               | -                |
| <b>Cu/Pd-BTC_1</b>                | 26.308 | 18208               | Fm-3m       | 6.018           | 4.79             |
| <b>Cu/Pd-BTC_2</b>                | 26.305 | 18203               | Fm-3m       | 6.618           | 5.17             |
| <b>Cu/Pd-BTC_3</b>                | 26.293 | 18178               | Fm-3m       | 7.201           | 6.09             |

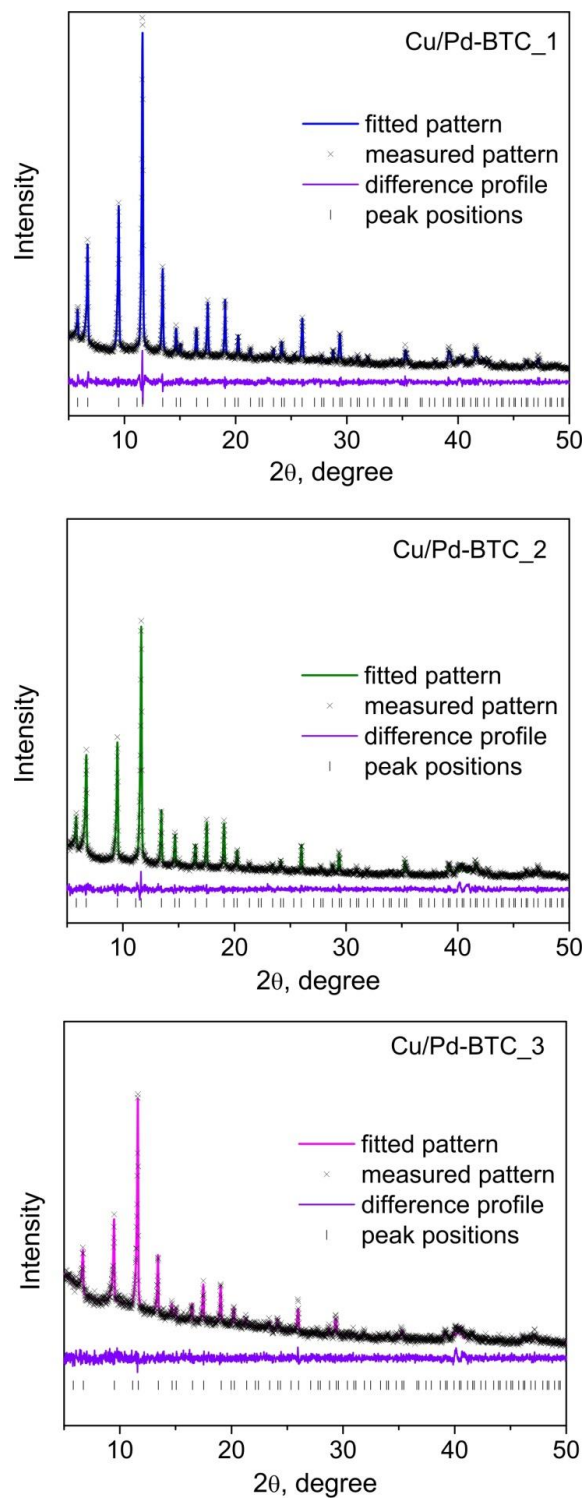

**Figure S3.** Pawley Fits of samples **Cu/Pd-BTC\_1-3**. Blue, olive and magenta lines represent the fitted pattern of **Cu/Pd-BTC\_1, 2** and **3**, respectively. Black ticks - theoretical positions of the Bragg reflections; Black crosses - the experimental data; Violet lines - the difference between fitted and measured patterns.

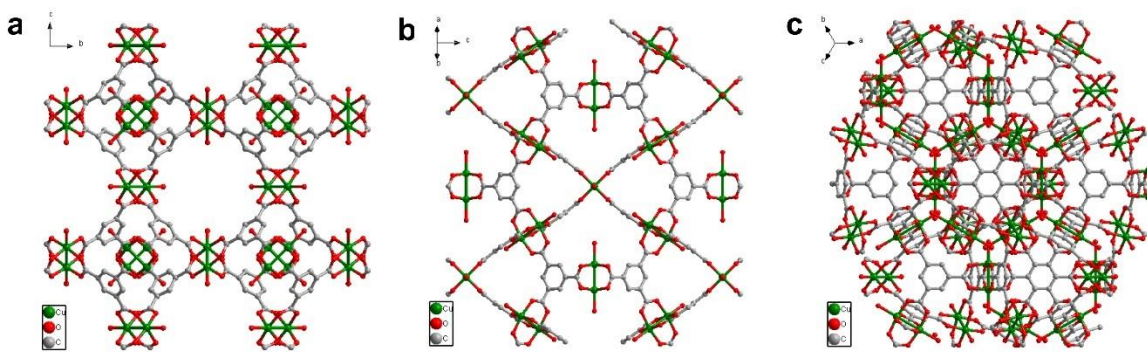

**Figure S4.** Crystal structure of Cu-HKSUT-1 ( $[\text{Cu}_3(\text{BTC})_2]_n$ ) viewing along plane (200) (a), plane (220) (b) and plane (222) (c).

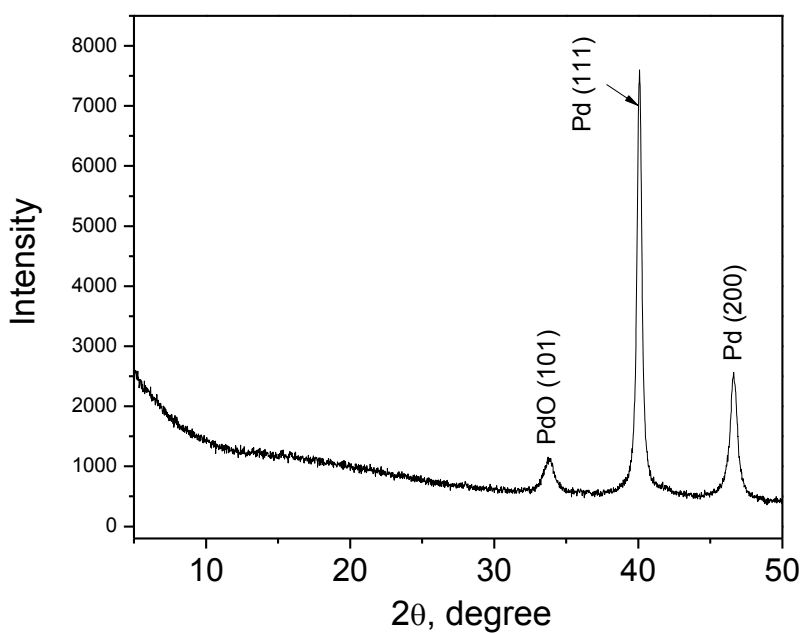

**Figure S5.** PXRD patterns of the sample prepared using only Pd(II)-acetate and  $\text{H}_3\text{BTC}$  under the same conditions as introduced mixed-metal solids with 10%, 15% and 20% feeding of Pd(II)-acetate. No Cu-salt was employed.

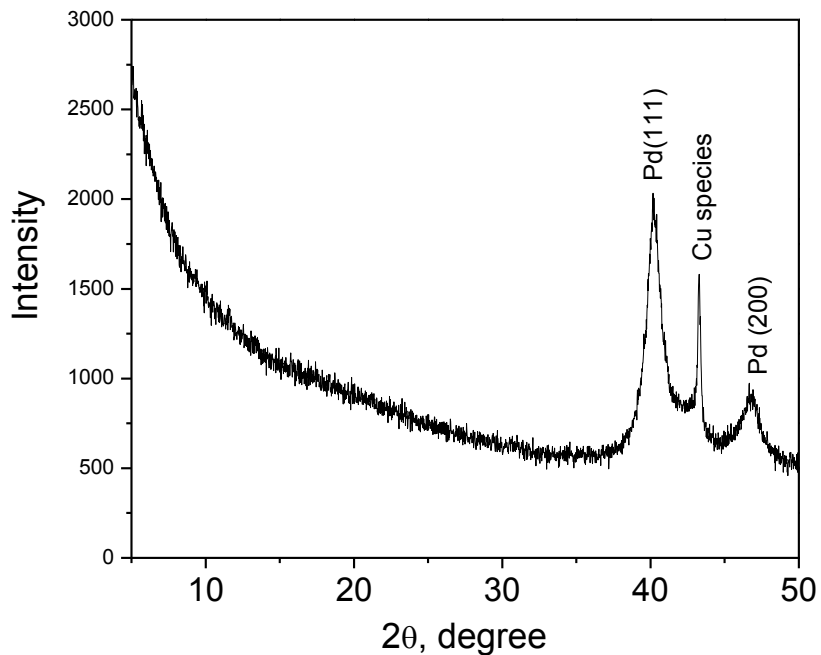

**Figure S6.** PXRD patterns of the sample obtained using 50% feeding of Pd(II)-acetate under the same conditions as Pd@[Cu<sub>3-x</sub>Pd<sub>x</sub>(BTC)<sub>2</sub>]<sub>n</sub> with 10%, 15% and 20% feeding .

**Table S2.** Feeding and obtained contents of Pd in respect to the total metal amount in Pd@[Cu<sub>3-x</sub>Pd<sub>x</sub>(BTC)<sub>2</sub>]<sub>n</sub> (**Cu/Pd-BTC\_1-4**). The Pd-molar fraction(%) were calculated from the obtained AAS results.

| Sample             | feeding (molar%) | obtained (molar%) | obtained wt% |
|--------------------|------------------|-------------------|--------------|
| <b>Cu/Pd-BTC_1</b> | 10               | 9                 | 3.9          |
| <b>Cu/Pd-BTC_2</b> | 15               | 14                | 6.2          |
| <b>Cu/Pd-BTC_3</b> | 20               | 20                | 9.2          |
| <b>Cu/Pd-BTC_4</b> | 20               | 12                | 5.2          |

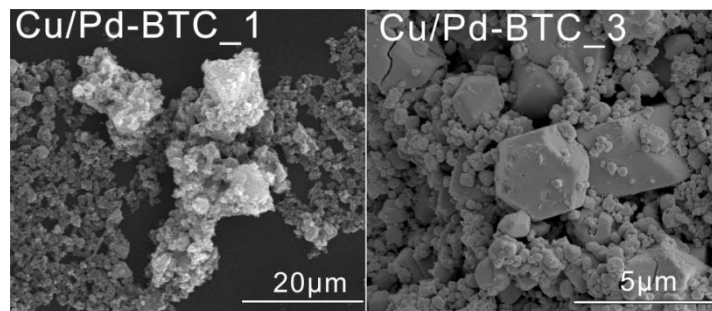

**Figure S7.** SEM images of samples **Cu/Pd-BTC\_1** and **3**.



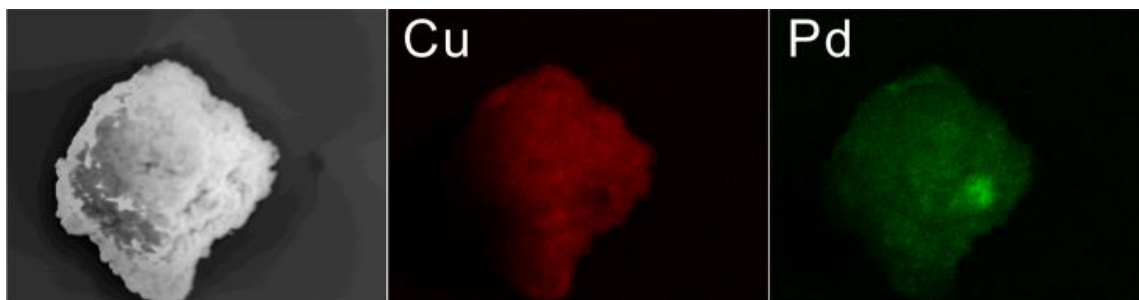

**Figure S8.** EDX elemental mapping of the **Cu/Pd-BTC\_3** solid (red – Cu; green – Pd).

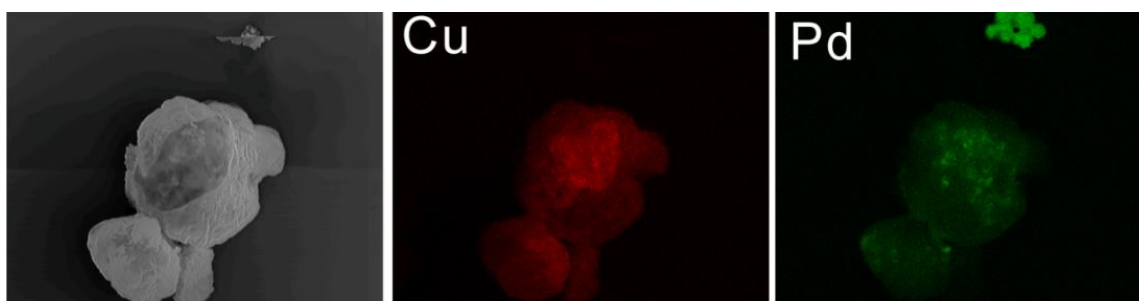

**Figure S9.** EDX elemental mapping of **Cu/Pd-BTC\_4** which indicates the homogeneous distribution of Cu and Pd within the sample. Red: Cu mapping; green, Pd mapping.

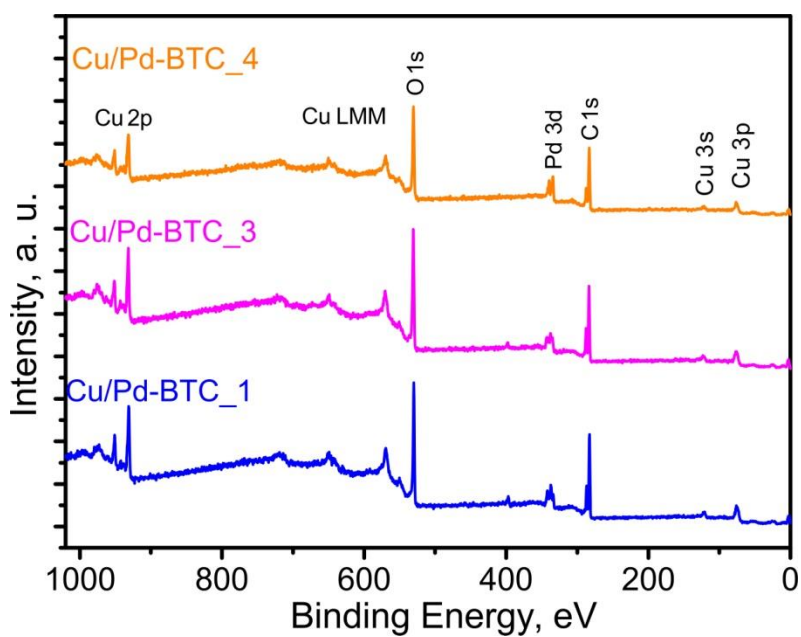

**Figure S10.** XPS survey scans of the obtained samples **Cu/Pd-BTC\_1, \_3** and **-4**. No detection of Cl indicates that Pd<sup>2+</sup> in **Cu/Pd-BTC\_4** should originate from Pd<sup>2+</sup> framework incorporation rather than residual or loading PdCl<sub>2</sub>.

**Table S3.** The assignment of binding energies as well as the determined molar fraction of Pd<sup>2+</sup> and Pd<sup>0</sup> in **Cu/Pd-BTC\_1, \_3** and **\_4**.

| Sample             | Binding energy, eV   |                      | Assignment             | Molar fraction (%)                                      |                                                        |
|--------------------|----------------------|----------------------|------------------------|---------------------------------------------------------|--------------------------------------------------------|
|                    | Pd 3d <sub>3/2</sub> | Pd 3d <sub>5/2</sub> |                        | Pd <sup>2+</sup> : (Pd <sup>2+</sup> +Pd <sup>0</sup> ) | Pd <sup>0</sup> : (Pd <sup>2+</sup> +Pd <sup>0</sup> ) |
| <b>Cu/Pd-BTC_1</b> | 344.2                | 338.9                | Pd <sup>2+</sup> (Pd1) | 67                                                      | 33                                                     |
|                    | 343.2                | 337.9                | Pd <sup>2+</sup> (Pd2) |                                                         |                                                        |
|                    | 340.9                | 335.6                | Pd <sup>0</sup> (Pd3)  |                                                         |                                                        |
| <b>Cu/Pd-BTC_3</b> | 344.2                | 338.9                | Pd <sup>2+</sup> (Pd1) | 56                                                      | 44                                                     |
|                    | 343.2                | 337.9                | Pd <sup>2+</sup> (Pd2) |                                                         |                                                        |
|                    | 341.2                | 335.9                | Pd <sup>0</sup> (Pd3)  |                                                         |                                                        |
| <b>Cu/Pd-BTC_4</b> | 343.6                | 338.4                | Pd <sup>2+</sup> (Pd1) | 30                                                      | 70                                                     |
|                    | 342.4                | 337.2                | Pd <sup>2+</sup> (Pd2) |                                                         |                                                        |
|                    | 340.9                | 335.7                | Pd <sup>0</sup> (Pd3)  |                                                         |                                                        |

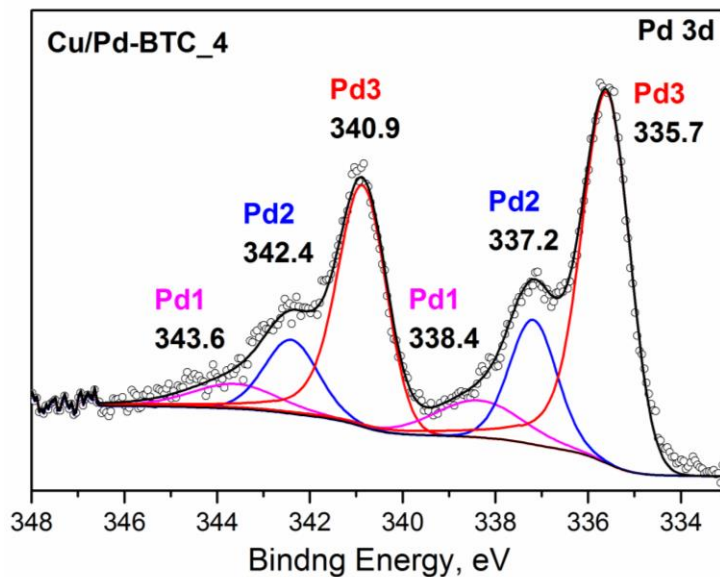

**Figure S11.** Deconvoluted XP spectra of **Cu/Pd-BTC\_4** in Pd 3d region. The doublet with the label of Pd3 is attributed to the metallic Pd<sup>0</sup> species.

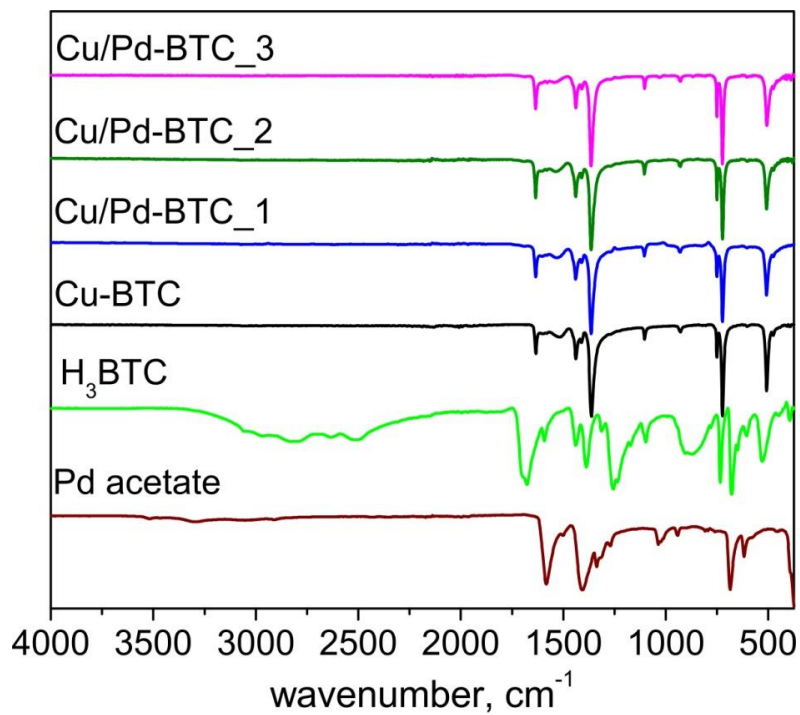

**Figure S12.** IR spectra of the activated samples **Cu/Pd-BTC\_1-3** in comparison with parent Cu-BTC as well as H<sub>3</sub>BTC and Pd-acetate.

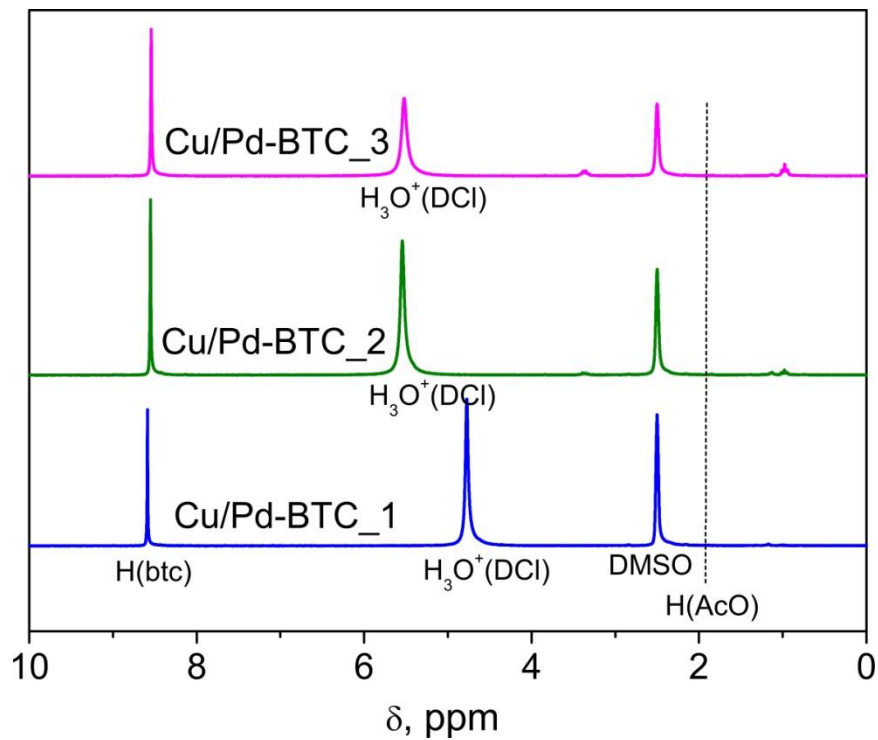

**Figure S13.** <sup>1</sup>H-NMR spectra of the digested activated **Cu/Pd-BTC\_1-3** samples. The vertical dash line stands for the position where the peak of CH<sub>3</sub>-protons from the acetic acid commonly appear.

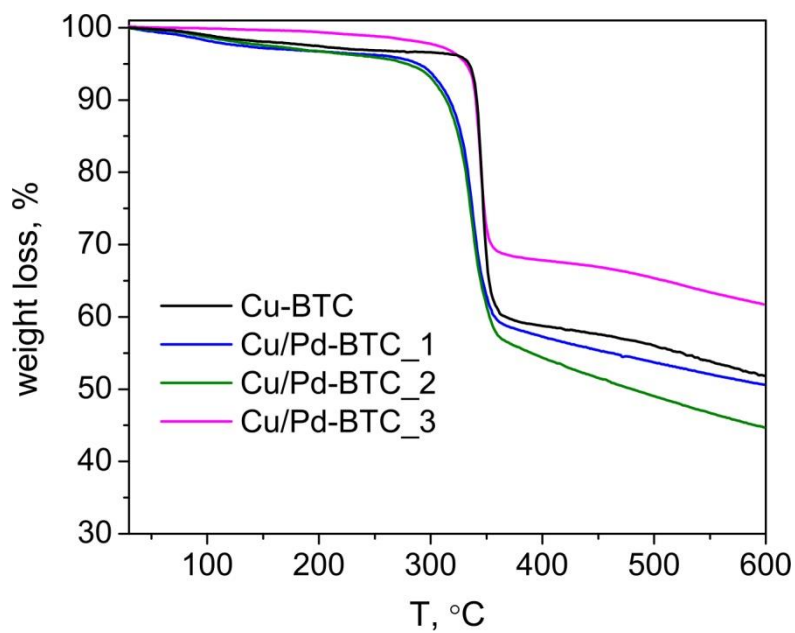

**Figure S14.** TG curves of the prepared Pd-doped solids **Cu/Pd-BTC\_1-3** in comparison with “non-doped” material Cu-BTC.

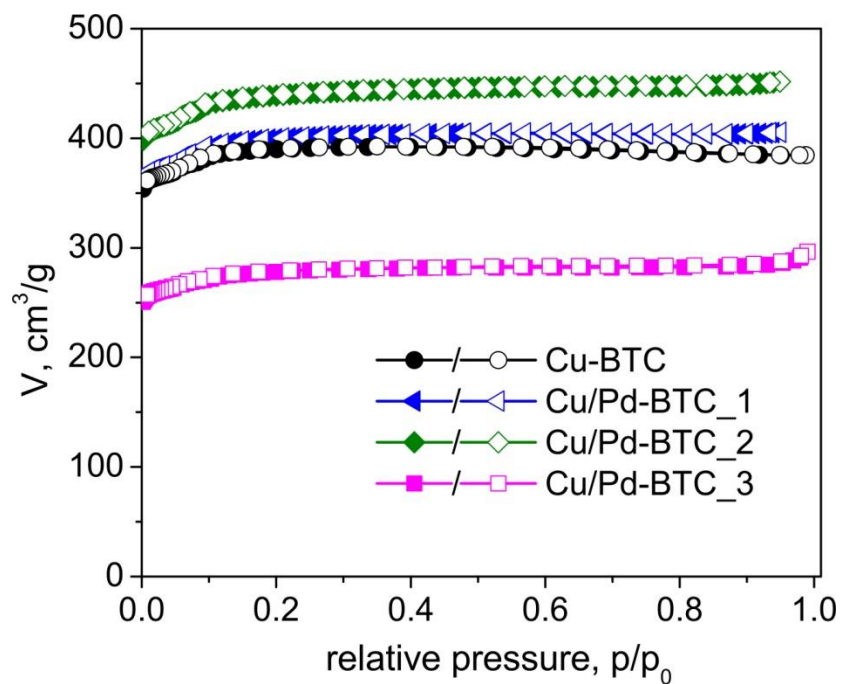

**Figure S15.** N<sub>2</sub> sorption isotherms collected at 77 K for the non-doped [Cu<sub>3</sub>(BTC)<sub>2</sub>]<sub>n</sub> (Cu-BTC) and Pd-doped solids Pd@[Cu<sub>3-x</sub>Pd<sub>x</sub>(BTC)<sub>2</sub>]<sub>n</sub> (**Cu/Pd-BTC\_1-3**).

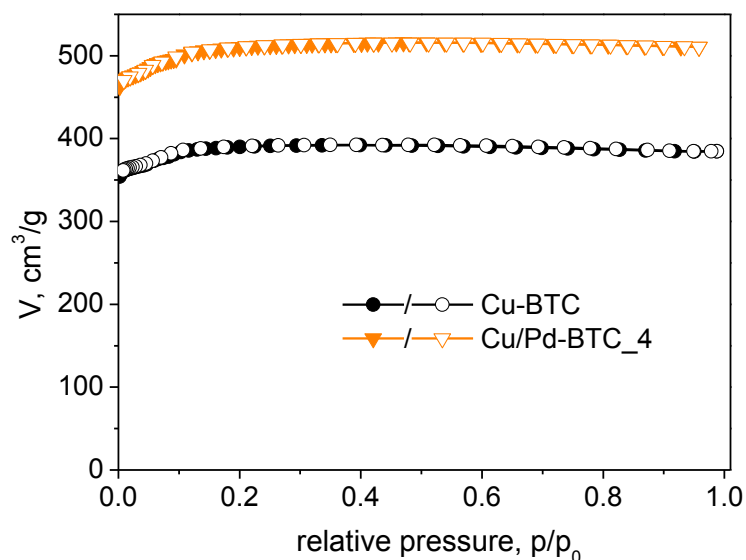

**Figure S16.** N<sub>2</sub> sorption isotherms collected at 77 K for the non-doped [Cu<sub>3</sub>(BTC)<sub>2</sub>]<sub>n</sub> (Cu-BTC) and Pd-doped solid **Cu/Pd-BTC\_4**. The high surface area indicates the external Pd<sup>0</sup> particles rather than being included into the volumes of MOF.

**Table S4.** BET surface areas ( $S_{\text{BET}}$ )\* of **Cu/Pd-BTC\_1-4** in comparison with “non-doped” Cu-BTC

| Sample                             | $S_{\text{BET}}$ (m <sup>2</sup> /g) | $S_{\text{BET}}$ (m <sup>2</sup> /mmol) |
|------------------------------------|--------------------------------------|-----------------------------------------|
| <b>Cu-BTC</b>                      | 1561                                 | 944                                     |
| <b>Cu/Pd-BTC_1</b> (9 mol% of Pd)  | 1594                                 | 982                                     |
| <b>Cu/Pd-BTC_2</b> (14 mol% of Pd) | 1750                                 | 1090                                    |
| <b>Cu/Pd-BTC_3</b> (20 mol% of Pd) | 1112                                 | 700                                     |
| <b>Cu/Pd-BTC_4</b> (12% of Pd)     | 2000                                 | 1240                                    |

\*  $S_{\text{BET}}$  in the unit of m<sup>2</sup>/g is calculated from the slope of BET plot by the software connected with the N<sub>2</sub> sorption instrument.  $S_{\text{BET}}$  in m<sup>2</sup>/mmol unit is calculated from  $S_{\text{BET}}$ (m<sup>2</sup>/g) and the estimated molecular weight. Specifically, the general formula of Pd<sup>0</sup>@[Cu<sub>3-x</sub>Pd<sub>x</sub>(BTC)<sub>2</sub>]<sub>n</sub> was concluded from two major data:

- (i) The measured PXRD patterns of Cu/Pd\_BTC is well-matched and fitted with the patterns of [Cu<sub>3</sub>(BTC)<sub>2</sub>]<sub>n</sub>.
- (ii) The presence of Pd<sup>0</sup> is determined from XPS and the small reflections at 40.02° in PXRD patterns.

Subsequently, the molar fraction of both Cu and Pd is calculated from the AAS results (mass fractions). Moreover, XPS results afford us the respective (relative) molar fraction of Pd<sup>0</sup> and Pd<sup>2+</sup>. However, given that the quantitative determination of metal species from XPS is not as precise as AAS, we calculate the molar weight in a simpler way. Namely, the molar weight of Cu/Pd-BTC are determined on the basis of a formula of [Cu<sub>3-x</sub>Pd<sub>x</sub>(BTC)<sub>2</sub>]<sub>n</sub> since the whole Pd content (including Pd<sup>0</sup> and Pd<sup>2+</sup>) for each sample is the same no matter we treat it as [Cu<sub>3-x</sub>Pd<sub>x</sub>(BTC)<sub>2</sub>]<sub>n</sub> or Pd<sup>0</sup>@[Cu<sub>3-x</sub>Pd<sub>x</sub>(BTC)<sub>2</sub>]<sub>n</sub>. The tiny deviation of Cu content is omitted for simplification. Hence, assuming that all the solids are fully activated (*i.e.* no guest molecules occluded in the pores) before N<sub>2</sub> sorption analysis, the BET surface area per mole is then calculated from  $S_{\text{BET}}$ (m<sup>2</sup>/g) and the estimate value of molecule weight for each sample: **Cu/Pd-**

**BTC\_1**,  $[\text{Cu}_{2.73}\text{Pd}_{0.27}(\text{C}_9\text{H}_3\text{O}_6)_2]_n$ -616 g/mol; **Cu/Pd-BTC\_2**,  $[\text{Cu}_{2.58}\text{Pd}_{0.42}(\text{C}_9\text{H}_3\text{O}_6)_2]_n$ -623 g/mol; **Cu/Pd-BTC\_3**,  $[\text{Cu}_{2.4}\text{Pd}_{0.6}(\text{BTC})_2]_n$ -630 g/mol; **Cu/Pd-BTC\_4**,  $[\text{Cu}_{2.64}\text{Pd}_{0.36}(\text{btc})_2]_n$ -620 g/mol; **Cu-BTC**,  $[\text{Cu}_3(\text{btc})_2]_n$ -605 g/mol.

### Catalytic test reaction

The catalytic hydrogenation of PNP to PAP using  $\text{NaBH}_4$  as a reducing agent was carried out in the aqueous phase using a  $100 \text{ cm}^3$  batch reactor at room temperature (298K), ambient pressure and  $1300 \text{ min}^{-1}$  stirring speed.<sup>3</sup> In a typical catalytic experiment,  $5.0 \text{ cm}^3$  of an aqueous solution of  $\text{NaBH}_4$  ( $0.60 \text{ mmol dm}^{-3}$ ) were added to  $90.0 \text{ cm}^3$  of an aqueous solution of PNP ( $0.18 \text{ mmol dm}^{-3}$ ). The reaction was started by introducing 5.0 mg of the activated catalyst (see "general procedure"). The PNP concentration changes was monitored *via* on-line UV-vis spectroscopy (AvaSpec-3648, optical path length: 5 mm) at a wavelength of 400 nm. The initial reaction rate ( $r_0$ ) was calculated by assuming a zero order reaction from the linear decrease of PNP concentration after the addition of the catalyst.

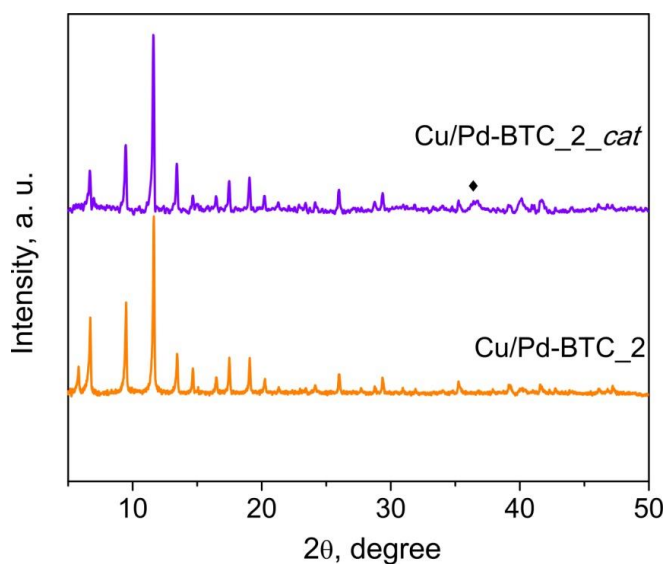

**Figure S17.** XPRD patterns of the sample with 14% of Pd-doping after the hydrogenation of PNP to PAP (**Cu/Pd-BTC\_2\_cat**) in comparison with that before the reaction (**Cu/Pd-BTC\_2**). The diamond symbol represents the reflection position of  $\text{Cu}_2\text{O}$  attributed to the reduction by  $\text{NaBH}_4$ .

### References

1. S. S. Y. Chui, S. M. F. Lo, J. P. H. Charmant, A. G. Orpen and I. D. Williams, *Science*, 1999, **283**, 1148-1150.

2. G. Pawley, *J. Appl. Cryst.*, 1981, **14**, 357-361.
3. M. Goepel, M. Al-Naji, P. With, G. Wagner, O. Oeckler, D. Enke and R. Gläser, *Chem. Eng. Technol.*, 2014, **37**, 551-554.
